# Supplementary material for: Absolute absorption cross-section and photolysis rate of I 2
Source: Copernicus journal article supplement (doi:10.5194/acp-4-1443-2004), 2004-05-05
Supplement: Supplementary file 1 [file Iodine_xsection.xls]

## Sheet: I2_295 K
wavelength / nm	cross-section / cm^2molecule^-1
	2003
182	5.50203e-18
183	1.22521e-17
184	1.49156e-17
185	1.92533e-17
186	2.27539e-17
187	2.19168e-17
188	2.34388e-17
189	2.03187e-17
190	2.19168e-17
191	1.89489e-17
192	1.63615e-17
193	1.46112e-17
194	1.33175e-17
195	1.28609e-17
196	1.08823e-17
197	9.5125e-18
198	8.5993e-18
199	7.9905e-18
200	7.10774e-18
201	6.67397e-18
202	6.15649e-18
203	5.73033e-18
204	5.46398e-18
205	5.16719e-18
206	4.90084e-18
207	4.68015e-18
208	4.47468e-18
209	4.37575e-18
210	4.20072e-18
211	3.93437e-18
212	3.89632e-18
213	3.82022e-18
214	3.59953e-18
215	3.52343e-18
216	3.31796e-18
217	3.31796e-18
218	3.26469e-18
219	3.08205e-18
220	2.96029e-18
221	2.91463e-18
222	2.87658e-18
223	2.74721e-18
224	2.65589e-18
225	2.59501e-18
226	2.53413e-18
227	2.45042e-18
228	2.37432e-18
229	2.29061e-18
230	2.26017e-18
231	2.18407e-18
232	2.12319e-18
233	2.06992e-18
234	2.00143e-18
235	1.98621e-18
236	1.9025e-18
237	1.86445e-18
238	1.79596e-18
239	1.72747e-18
240	1.69703e-18
241	1.65137e-18
242	1.58288e-18
243	1.52961e-18
244	1.52961e-18
245	1.47634e-18
246	1.43068e-18
247	1.3698e-18
248	1.34697e-18
249	1.31653e-18
250	1.25565e-18
251	1.24804e-18
252	1.22521e-18
253	1.16433e-18
254	1.12628e-18
255	1.09584e-18
256	1.0654e-18
257	1.05018e-18
258	1.02735e-18
259	1.01213e-18
260	9.7408e-19
261	9.3603e-19
262	9.0559e-19
263	8.9037e-19
264	8.7515e-19
265	8.371e-19
266	8.1427e-19
267	7.9144e-19
268	7.7622e-19
269	7.36648e-19
270	7.38931e-19
271	7.01642e-19
272	6.90988e-19
273	6.75007e-19
274	6.43806e-19
275	6.27064e-19
276	6.21737e-19
277	5.88253e-19
278	5.81404e-19
279	5.57052e-19
280	5.51725e-19
281	5.15958e-19
282	5.14436e-19
283	4.85518e-19
284	4.83235e-19
285	4.6421e-19
286	4.33009e-19
287	4.24638e-19
288	4.17028e-19
289	3.98764e-19
290	3.94198e-19
291	3.79739e-19
292	3.56909e-19
293	3.49299e-19
294	3.35601e-19
295	3.27991e-19
296	3.08966e-19
297	2.99834e-19
298	2.90702e-19
299	2.92985e-19
300	2.8157e-19
301	2.56794e-19
302	2.43937e-19
303	2.48802e-19
304	2.48802e-19
305	2.24825e-19
306	2.2135e-19
307	2.09536e-19
308	2.07103e-19
309	1.83821e-19
310	1.80694e-19
311	1.70964e-19
312	1.64362e-19
313	1.58455e-19
314	1.47335e-19
315	1.5915e-19
316	1.55675e-19
317	1.33088e-19
318	1.32393e-19
319	1.29613e-19
320	1.00772e-19
321	1.27876e-19
322	1.16756e-19
323	1.25791e-19
324	1.01814e-19
325	1.01814e-19
326	9.55594e-20
327	9.93817e-20
328	9.55594e-20
329	7.61e-20
330	7.12352e-20
331	8.13123e-20
332	6.35904e-20
333	7.22776e-20
334	6.0463e-20
335	6.60228e-20
336	5.35132e-20
337	5.80306e-20
338	5.55982e-20
339	4.27411e-20
340	5.35132e-20
341	3.75288e-20
342	4.51735e-20
343	5.00384e-20
344	3.57913e-20
345	3.96137e-20
346	4.79534e-20
347	3.19689e-20
348	2.74516e-20
349	2.95365e-20
350	3.44014e-20
351	1.84169e-20
352	1.84169e-20
353	2.11968e-20
354	1.28571e-20
355	3.44014e-20
356	1.45945e-20
357	1.59845e-20
358	4.16986e-21
359	1.45945e-20
360	6.94977e-21
361	1.77219e-20
362	1.70269e-20
363	1.91119e-20
364	2.15443e-20
365	1.04247e-21
366	4.86484e-21
367	4.86484e-21
368	4.86484e-21
369	5.55982e-21
370	1.6332e-20
371	1.38995e-21
372	3.47489e-21
373	1.4247e-20
374	2.43242e-21
375	1.14671e-20
376	5.90731e-21
377	9.0347e-21
378	4.16986e-21
379	1.35521e-20
380	2.43242e-21
381	2.11968e-20
382	1.4247e-20
383	2.22393e-20
384	4.16986e-21
385	1.18146e-20
386	8.33973e-21
387	3.47489e-21
388	1.66795e-20
389	1.6332e-20
390	5.55982e-21
391	6.25479e-21
392	2.08493e-21
393	1.00772e-20
394	6.25479e-21
395	4.51735e-21
396	9.38219e-21
397	2.44979e-20
398	3.666e-20
399	6.08105e-21
400	2.81257e-20
401	3.68407e-20
402	4.19905e-20
403	3.01064e-20
404	4.67442e-20
405	3.24832e-20
406	3.60485e-20
407	4.9121e-20
408	3.60485e-20
409	5.14978e-20
410	4.43673e-20
411	4.15944e-20
412	4.75364e-20
413	3.64446e-20
414	3.7633e-20
415	6.82148e-20
416	6.37781e-20
417	6.43326e-20
418	6.48872e-20
419	5.87867e-20
420	6.10051e-20
421	4.99133e-20
422	6.15597e-20
423	7.65337e-20
424	7.59791e-20
425	8.76255e-20
426	8.4298e-20
427	8.76255e-20
428	1.3231e-19
429	1.25179e-19
430	1.29141e-19
431	1.48155e-19
432	1.43402e-19
433	1.4974e-19
434	1.50532e-19
435	1.60039e-19
436	1.52909e-19
437	1.67962e-19
438	1.85392e-19
439	1.85392e-19
440	2.07576e-19
441	2.12329e-19
442	2.22629e-19
443	2.35305e-19
444	2.4402e-19
445	2.60658e-19
446	2.66204e-19
447	2.8205e-19
448	2.98687e-19
449	3.17702e-19
450	3.40678e-19
451	3.47808e-19
452	3.60485e-19
453	3.91383e-19
454	4.15152e-19
455	4.38128e-19
456	4.6348e-19
457	4.92002e-19
458	5.12601e-19
459	5.41915e-19
460	5.72814e-19
461	6.04505e-19
462	6.22727e-19
463	6.55211e-19
464	6.89278e-19
465	7.27308e-19
466	7.51076e-19
467	7.88313e-19
468	8.18419e-19
469	8.55656e-19
470	8.9527e-19
471	9.41221e-19
472	9.74497e-19
473	1.01649e-18
474	1.04105e-18
475	1.09096e-18
476	1.13295e-18
477	1.17177e-18
478	1.22089e-18
479	1.27477e-18
480	1.3128e-18
481	1.34766e-18
482	1.40312e-18
483	1.44828e-18
484	1.50136e-18
485	1.54256e-18
486	1.59881e-18
487	1.64555e-18
488	1.68121e-18
489	1.73508e-18
490	1.78341e-18
491	1.84996e-18
492	1.88878e-18
493	1.93632e-18
494	1.9894e-18
495	2.03852e-18
496	2.08289e-18
497	2.13359e-18
498	2.17479e-18
499	2.21361e-18
500	2.29297e-18
500.1	2.29217e-18
500.2	2.29697e-18
500.3	2.30736e-18
500.4	2.31215e-18
500.5	2.31056e-18
500.6	2.32494e-18
500.7	2.31535e-18
500.8	2.33853e-18
500.9	2.32894e-18
501	2.30976e-18
501.1	2.35931e-18
501.2	2.33693e-18
501.3	2.33933e-18
501.4	2.3657e-18
501.5	2.3729e-18
501.6	2.34812e-18
501.7	2.35931e-18
501.8	2.39607e-18
501.9	2.3633e-18
502	2.36756e-18
502.1	2.4047e-18
502.2	2.42811e-18
502.3	2.40308e-18
502.4	2.38774e-18
502.5	2.43053e-18
502.6	2.46524e-18
502.7	2.44021e-18
502.8	2.4055e-18
502.9	2.41438e-18
503	2.47815e-18
503.1	2.45474e-18
503.2	2.42326e-18
503.3	2.4055e-18
503.4	2.46524e-18
503.5	2.52255e-18
503.6	2.49672e-18
503.7	2.45151e-18
503.8	2.41035e-18
503.9	2.49107e-18
504	2.54354e-18
504.1	2.5169e-18
504.2	2.48461e-18
504.3	2.45717e-18
504.4	2.43699e-18
504.5	2.55645e-18
504.6	2.55161e-18
504.7	2.51206e-18
504.8	2.48784e-18
504.9	2.45071e-18
505	2.49612e-18
505.1	2.62555e-18
505.2	2.6321e-18
505.3	2.58705e-18
505.4	2.55838e-18
505.5	2.52069e-18
505.6	2.51987e-18
505.7	2.6321e-18
505.8	2.68699e-18
505.9	2.62883e-18
506	2.57394e-18
506.1	2.55756e-18
506.2	2.52725e-18
506.3	2.57312e-18
506.4	2.68535e-18
506.5	2.71566e-18
506.6	2.66241e-18
506.7	2.60671e-18
506.8	2.5895e-18
506.9	2.54527e-18
507	2.52315e-18
507.1	2.70583e-18
507.2	2.75416e-18
507.3	2.69682e-18
507.4	2.66159e-18
507.5	2.61408e-18
507.6	2.56575e-18
507.7	2.53708e-18
507.8	2.64521e-18
507.9	2.81724e-18
508	2.79594e-18
508.1	2.72467e-18
508.2	2.65504e-18
508.3	2.62227e-18
508.4	2.59032e-18
508.5	2.54609e-18
508.6	2.62309e-18
508.7	2.84428e-18
508.8	2.81561e-18
508.9	2.80659e-18
509	2.74597e-18
509.1	2.66078e-18
509.2	2.61736e-18
509.3	2.55018e-18
509.4	2.59196e-18
509.5	2.78611e-18
509.6	2.91063e-18
509.7	2.83772e-18
509.8	2.78693e-18
509.9	2.72877e-18
510	2.77267e-18
510.1	2.72483e-18
510.2	2.65182e-18
510.3	2.62833e-18
510.4	2.8247e-18
510.5	3.01603e-18
510.6	2.98162e-18
510.7	2.92456e-18
510.8	2.84232e-18
510.9	2.78525e-18
511	2.70301e-18
511.1	2.66106e-18
511.2	2.64091e-18
511.3	2.74246e-18
511.4	3.07142e-18
511.5	3.08149e-18
511.6	2.99589e-18
511.7	2.91365e-18
511.8	2.85239e-18
511.9	2.82805e-18
512	2.79197e-18
512.1	2.72399e-18
512.2	2.66022e-18
512.3	2.80372e-18
512.4	3.06974e-18
512.5	3.09911e-18
512.6	3.07142e-18
512.7	2.99757e-18
512.8	2.93883e-18
512.9	2.87924e-18
513	2.79868e-18
513.1	2.71308e-18
513.2	2.66273e-18
513.3	2.63001e-18
513.4	2.97827e-18
513.6	3.23086e-18
513.7	3.13603e-18
513.8	3.03281e-18
513.9	2.94722e-18
514	2.87253e-18
514.1	2.78106e-18
514.2	2.73994e-18
514.3	2.7005e-18
514.4	2.66106e-18
514.6	3.00848e-18
514.7	3.25856e-18
514.8	3.18387e-18
514.9	3.08065e-18
515	3.03801e-18
515.1	3.00708e-18
515.2	2.95295e-18
515.3	2.83782e-18
515.4	2.75277e-18
515.6	2.66427e-18
515.7	2.76995e-18
515.8	3.31208e-18
515.9	3.34301e-18
516	3.26998e-18
516.1	3.20812e-18
516.2	3.11877e-18
516.3	2.98904e-18
516.4	2.92632e-18
516.6	2.80518e-18
516.7	2.76995e-18
516.8	2.64967e-18
516.9	2.74761e-18
517	3.41346e-18
517.1	3.459e-18
517.2	3.3516e-18
517.3	3.23648e-18
517.4	3.15829e-18
517.6	3.06378e-18
517.7	2.92718e-18
517.8	2.88422e-18
517.9	2.74417e-18
518	2.73386e-18
518.1	2.69177e-18
518.2	2.92202e-18
518.3	3.53633e-18
518.4	3.49852e-18
518.6	3.38941e-18
518.7	3.23218e-18
518.8	3.154e-18
518.9	3.06378e-18
519	2.9667e-18
519.1	2.8782e-18
519.2	2.85415e-18
519.3	2.71324e-18
519.4	2.65998e-18
519.6	2.95467e-18
519.7	3.48907e-18
519.8	3.56554e-18
519.9	3.43065e-18
520	3.37944e-18
520.1	3.27482e-18
520.2	3.208e-18
520.3	3.09987e-18
520.4	3.03745e-18
520.6	2.93547e-18
520.7	2.82733e-18
520.8	2.73766e-18
520.9	2.67085e-18
521	3.23877e-18
521.1	3.71e-18
521.2	3.65285e-18
521.3	3.56406e-18
521.4	3.43834e-18
521.6	3.32405e-18
521.7	3.27306e-18
521.8	3.14383e-18
521.9	3.04097e-18
522	2.94514e-18
522.1	2.81942e-18
522.2	2.72711e-18
522.3	2.67348e-18
522.4	2.77019e-18
522.6	3.66692e-18
522.7	3.79264e-18
522.8	3.64406e-18
522.9	3.55966e-18
523	3.35922e-18
523.1	3.32845e-18
523.2	3.19482e-18
523.3	3.06646e-18
523.4	2.9847e-18
523.6	2.90118e-18
523.7	2.77546e-18
523.8	2.67348e-18
523.9	2.59788e-18
524	3.06382e-18
524.1	3.74428e-18
524.2	3.84539e-18
524.3	3.71879e-18
524.4	3.51922e-18
524.6	3.45504e-18
524.7	3.32933e-18
524.8	3.22471e-18
524.9	3.08404e-18
525	3.01195e-18
525.1	2.888e-18
525.2	2.7992e-18
525.3	2.70777e-18
525.4	2.6137e-18
525.6	2.65678e-18
525.7	3.22031e-18
525.8	3.93682e-18
525.9	3.80407e-18
526	3.67131e-18
526.1	3.54296e-18
526.2	3.42691e-18
526.3	3.30823e-18
526.4	3.14383e-18
526.6	3.06822e-18
526.7	2.95745e-18
526.8	2.88008e-18
526.9	2.74382e-18
527	2.64975e-18
527.1	2.57414e-18
527.2	2.52842e-18
527.3	3.24317e-18
527.4	3.98781e-18
527.6	3.93857e-18
527.7	3.83563e-18
527.8	3.68794e-18
527.9	3.5304e-18
528	3.36569e-18
528.1	3.27707e-18
528.2	3.13117e-18
528.3	3.02644e-18
528.4	2.88411e-18
528.6	2.85905e-18
528.7	2.75521e-18
528.8	2.66122e-18
528.9	2.58693e-18
529	2.7391e-18
529.1	3.51697e-18
529.2	4.07821e-18
529.3	3.9153e-18
529.4	3.80431e-18
529.6	3.62528e-18
529.7	3.49011e-18
529.8	3.38359e-18
529.9	3.24664e-18
530	3.26835e-18
530.1	3.11761e-18
530.2	3.03765e-18
530.3	2.88967e-18
530.4	2.7803e-18
530.6	2.67368e-18
530.7	2.61394e-18
530.8	2.52203e-18
530.9	3.12313e-18
531	4.15896e-18
531.1	4.1369e-18
531.2	3.96319e-18
531.3	3.82165e-18
531.4	3.71411e-18
531.6	3.56062e-18
531.7	3.40345e-18
531.8	3.31154e-18
531.9	3.18011e-18
532	3.03397e-18
532.1	2.91357e-18
532.2	2.83269e-18
532.3	2.70218e-18
532.4	2.60107e-18
532.6	2.52846e-18
532.7	2.42093e-18
532.8	2.89243e-18
532.9	4.12403e-18
533	4.238e-18
533.1	4.03212e-18
533.2	3.8336e-18
533.3	3.71044e-18
533.4	3.56981e-18
533.6	3.38231e-18
533.7	3.28949e-18
533.8	3.17e-18
533.9	3.01651e-18
534	2.87864e-18
534.1	2.77846e-18
534.2	2.65806e-18
534.3	2.59556e-18
534.4	2.56063e-18
534.6	2.4724e-18
534.7	2.42828e-18
534.8	2.96688e-18
534.9	4.16448e-18
535	4.07992e-18
535.1	3.90988e-18
535.2	3.82532e-18
535.3	3.61853e-18
535.4	3.45492e-18
535.6	3.31522e-18
535.7	3.18746e-18
535.8	3.06614e-18
535.9	2.95033e-18
536	2.9007e-18
536.1	2.80144e-18
536.2	2.72056e-18
536.3	2.59188e-18
536.4	2.48343e-18
536.6	2.41817e-18
536.7	2.32626e-18
536.8	2.77662e-18
536.9	3.77753e-18
537	4.14793e-18
537.1	3.95676e-18
537.2	3.77845e-18
537.4	3.60198e-18
537.5	3.43287e-18
537.6	3.33452e-18
537.7	3.2371e-18
537.8	3.13783e-18
538	2.99078e-18
538.1	2.79592e-18
538.2	2.67184e-18
538.4	2.54868e-18
538.5	2.46872e-18
538.6	2.35567e-18
538.7	2.26192e-18
538.8	2.24446e-18
539	3.85198e-18
539.1	4.09278e-18
539.2	3.88874e-18
539.4	3.78029e-18
539.5	3.65621e-18
539.6	3.5257e-18
539.7	3.37496e-18
539.8	3.2132e-18
540	3.05603e-18
540.1	2.89059e-18
540.2	2.73159e-18
540.4	2.60659e-18
540.5	2.46045e-18
540.6	2.38233e-18
540.7	2.24906e-18
540.8	2.18656e-18
541	2.16542e-18
541.1	2.74445e-18
541.2	4.01926e-18
541.4	4.06062e-18
541.5	3.8869e-18
541.6	3.78213e-18
541.7	3.57349e-18
541.8	3.37129e-18
542	3.20677e-18
542.1	2.97975e-18
542.2	2.88048e-18
542.4	2.74537e-18
542.5	2.63232e-18
542.6	2.50732e-18
542.7	2.36486e-18
542.8	2.26192e-18
543	2.18472e-18
543.1	2.23435e-18
543.2	2.26836e-18
543.4	2.55879e-18
543.5	3.91815e-18
543.6	4.06705e-18
543.7	3.86117e-18
543.8	3.65069e-18
544	3.45584e-18
544.1	3.24813e-18
544.2	3.14059e-18
544.4	2.96228e-18
544.5	2.82166e-18
544.6	2.67276e-18
544.7	2.52203e-18
544.8	2.43931e-18
545	2.32534e-18
545.1	2.25273e-18
545.2	2.39887e-18
545.4	2.4053e-18
545.5	2.30512e-18
545.6	2.1985e-18
545.7	2.47332e-18
545.8	3.71939e-18
546	3.41309e-18
546.1	3.63783e-18
546.2	3.45492e-18
546.4	3.24629e-18
546.5	3.13967e-18
546.6	3.00364e-18
546.7	2.83545e-18
546.8	2.68287e-18
547	2.58269e-18
547.1	2.4099e-18
547.2	2.3474e-18
547.4	2.31339e-18
547.5	2.36578e-18
547.6	2.46688e-18
547.7	2.35659e-18
547.8	2.22792e-18
548	2.11119e-18
548.1	2.07994e-18
548.2	3.05327e-18
548.4	3.72238e-18
548.5	3.53489e-18
548.6	3.41265e-18
548.7	3.22607e-18
548.8	3.04684e-18
549	2.88048e-18
549.1	2.7178e-18
549.2	2.56615e-18
549.4	2.50824e-18
549.5	2.44666e-18
549.6	2.33729e-18
549.7	2.26468e-18
549.8	2.49997e-18
550	2.51743e-18
550.1	2.38508e-18
550.2	2.25181e-18
550.4	2.0974e-18
550.5	2.04042e-18
550.6	1.97149e-18
550.7	2.51743e-18
550.8	3.47606e-18
551	3.45309e-18
551.1	3.2132e-18
551.2	2.99813e-18
551.4	2.8667e-18
551.5	2.74537e-18
551.6	2.63968e-18
551.7	2.52755e-18
551.8	2.44574e-18
552	2.30236e-18
552.1	2.20586e-18
552.2	2.42185e-18
552.4	2.56799e-18
552.5	2.44391e-18
552.6	2.37773e-18
552.7	2.23619e-18
552.8	2.1213e-18
553	2.04869e-18
553.1	1.92461e-18
553.2	1.87038e-18
553.4	2.69298e-18
553.5	3.21412e-18
553.6	3.13048e-18
553.7	2.95309e-18
553.8	2.86761e-18
554	2.74813e-18
554.1	2.53398e-18
554.2	2.39519e-18
554.4	2.30144e-18
554.5	2.17093e-18
554.6	2.11211e-18
554.7	2.32626e-18
554.8	2.57718e-18
555	2.4678e-18
555.1	2.34648e-18
555.2	2.23619e-18
555.4	2.1259e-18
555.5	2.02847e-18
555.6	1.90255e-18
555.7	1.78858e-18
555.8	1.76285e-18
556	1.81708e-18
556.1	2.91173e-18
556.2	2.99353e-18
556.4	2.82166e-18
556.5	2.65071e-18
556.6	2.52846e-18
556.7	2.4053e-18
556.8	2.26376e-18
557	2.16082e-18
557.1	2.00273e-18
557.2	2.102e-18
557.4	2.47332e-18
557.5	2.54225e-18
557.6	2.35843e-18
557.7	2.26744e-18
557.8	2.15439e-18
558	2.03858e-18
558.1	1.93748e-18
558.2	1.86946e-18
558.4	1.75549e-18
558.5	1.68748e-18
558.6	1.61211e-18
558.7	1.64428e-18
558.8	2.10935e-18
559	2.63876e-18
559.1	2.53766e-18
559.2	2.38141e-18
559.4	2.25089e-18
559.5	2.1599e-18
559.6	2.0781e-18
559.7	1.93196e-18
559.8	1.86119e-18
560	2.19575e-18
560.1	2.49997e-18
560.3	2.04841e-18
560.4	1.97648e-18
560.5	1.89816e-18
560.7	1.82623e-18
560.8	1.70155e-18
560.9	1.62642e-18
561	1.53131e-18
561.1	1.47137e-18
561.3	1.36907e-18
561.4	1.30353e-18
561.5	1.26757e-18
561.7	1.35389e-18
561.8	1.97808e-18
561.9	2.03083e-18
562	1.88057e-18
562.1	1.76069e-18
562.3	1.65679e-18
562.4	1.61044e-18
562.5	1.56888e-18
562.7	1.53851e-18
562.8	2.04202e-18
562.9	2.1603e-18
563	2.09237e-18
563.1	2.04202e-18
563.3	1.91254e-18
563.4	1.74471e-18
563.5	1.64001e-18
563.7	1.58806e-18
563.8	1.52332e-18
563.9	1.45619e-18
564	1.30273e-18
564.1	1.32032e-18
564.3	1.27236e-18
564.4	1.12371e-18
564.5	1.03739e-18
564.7	1.25958e-18
564.8	1.73751e-18
564.9	1.7495e-18
565	1.63601e-18
565.1	1.52572e-18
565.3	1.45858e-18
565.4	1.437e-18
565.5	1.47457e-18
565.7	2.04841e-18
565.8	2.08038e-18
565.9	1.91894e-18
566	1.89336e-18
566.1	1.84221e-18
566.3	1.67677e-18
566.4	1.62802e-18
566.5	1.46258e-18
566.7	1.36427e-18
566.8	1.40903e-18
566.9	1.28595e-18
567	1.17726e-18
567.1	1.14449e-18
567.3	1.07576e-18
567.4	1.00063e-18
567.5	9.68659e-19
567.7	1.00862e-18
567.8	1.34669e-18
567.9	1.41223e-18
568	1.41463e-18
568.1	1.42901e-18
568.3	1.36587e-18
568.4	1.15408e-18
568.5	1.56088e-18
568.7	2.03482e-18
568.8	1.95011e-18
568.9	1.83182e-18
569	1.70315e-18
569.1	1.64001e-18
569.3	1.47297e-18
569.4	1.3355e-18
569.5	1.31392e-18
569.7	1.32991e-18
569.8	1.32272e-18
569.9	1.39784e-18
570	1.17566e-18
570.1	1.06297e-18
570.3	1.01262e-18
570.4	9.20706e-19
570.5	7.90432e-19
570.7	7.03317e-19
570.8	8.80745e-19
570.9	1.2372e-18
571	1.27476e-18
571.1	1.25638e-18
571.3	1.22841e-18
571.4	1.13889e-18
571.5	1.17225e-18
571.7	1.47169e-18
571.8	1.43739e-18
571.9	1.383e-18
572	1.36986e-18
572.1	1.29507e-18
572.3	1.23993e-18
572.4	1.1798e-18
572.5	1.18327e-18
572.7	1.13553e-18
572.8	1.09429e-18
572.9	1.07404e-18
573	9.82033e-19
573.1	9.58162e-19
573.2	9.17219e-19
573.4	8.65851e-19
573.5	8.88362e-19
573.7	8.93348e-19
573.8	8.37599e-19
573.9	7.61151e-19
574	8.21433e-19
574.1	8.99542e-19
574.3	9.22204e-19
574.4	9.34291e-19
574.5	8.91837e-19
574.7	1.03778e-18
574.8	1.31396e-18
574.9	1.31774e-18
575	1.25504e-18
575.1	1.2073e-18
575.3	1.15548e-18
575.4	1.13931e-18
575.5	1.16998e-18
575.7	1.14445e-18
575.8	1.0686e-18
575.9	1.03944e-18
576	1.01754e-18
576.1	9.64507e-19
576.3	9.21147e-19
576.4	8.87909e-19
576.5	8.63283e-19
576.7	8.04058e-19
576.8	7.6795e-19
576.9	7.76713e-19
577	7.69763e-19
577.1	7.49669e-19
577.3	6.88027e-19
577.4	6.92107e-19
577.5	8.02245e-19
577.7	8.17958e-19
577.8	8.29138e-19
577.9	9.89134e-19
578	1.22497e-18
578.1	1.22558e-18
578.3	1.15442e-18
578.4	1.10501e-18
578.5	1.10063e-18
578.7	1.13916e-18
578.8	1.11151e-18
578.9	1.03748e-18
579	1.01739e-18
579.1	1.01724e-18
579.3	9.74328e-19
579.4	9.25226e-19
579.5	8.63585e-19
579.7	8.31555e-19
579.8	8.40469e-19
579.9	7.91519e-19
580	7.54352e-19
580.1	6.99359e-19
580.3	7.00567e-19
580.4	6.87876e-19
580.5	6.45573e-19
580.7	6.27444e-19
580.8	6.48595e-19
580.9	7.49669e-19
581	7.64324e-19
581.1	7.62511e-19
581.3	9.5363e-19
581.4	1.09716e-18
581.5	1.06286e-18
581.7	1.02418e-18
581.8	1.07721e-18
581.9	1.07495e-18
582	1.04534e-18
582.1	1.03053e-18
582.3	9.62392e-19
582.4	9.15708e-19
582.6	8.94708e-19
582.7	9.08305e-19
582.8	8.25059e-19
583	7.70216e-19
583.1	7.41662e-19
583.3	6.79718e-19
583.4	6.92862e-19
583.6	7.13711e-19
583.7	7.06762e-19
583.8	6.8984e-19
584	5.61723e-19
584.1	5.5855e-19
584.3	5.17607e-19
584.4	5.5432e-19
584.6	6.00249e-19
584.7	8.95161e-19
584.8	8.92743e-19
585	9.43507e-19
585.1	1.0541e-18
585.3	1.0192e-18
585.4	9.77198e-19
585.6	9.38521e-19
585.7	8.66002e-19
585.8	8.09648e-19
586	7.66892e-19
586.1	7.46949e-19
586.3	7.33956e-19
586.4	6.78056e-19
586.6	6.51314e-19
586.7	6.67178e-19
586.8	6.2699e-19
587	6.40285e-19
587.1	6.06745e-19
587.3	5.51751e-19
587.4	5.52356e-19
587.6	5.59457e-19
587.7	5.3755e-19
587.8	4.86484e-19
588	5.00686e-19
588.1	6.08105e-19
588.3	7.53748e-19
588.4	8.15994e-19
588.6	9.35651e-19
588.7	9.59068e-19
588.8	9.16766e-19
589	8.63283e-19
589.1	8.10857e-19
589.3	7.7913e-19
589.4	7.21417e-19
589.6	7.12654e-19
589.7	7.25647e-19
589.8	6.8561e-19
590	6.48444e-19
590.1	6.03119e-19
590.3	6.06896e-19
590.4	5.91486e-19
590.6	5.5991e-19
590.7	5.35435e-19
590.8	4.84671e-19
591	4.84369e-19
591.1	5.08844e-19
591.3	4.52642e-19
591.4	4.40706e-19
591.6	4.35569e-19
591.7	4.23785e-19
591.8	5.16398e-19
592	7.90159e-19
592.1	8.56635e-19
592.3	8.53764e-19
592.4	8.29289e-19
592.6	8.01188e-19
592.7	7.66137e-19
592.8	7.34863e-19
593	6.76394e-19
593.1	6.8984e-19
593.3	6.47386e-19
593.4	6.14148e-19
593.6	6.05083e-19
593.7	5.56888e-19
593.8	5.48428e-19
594	5.32262e-19
594.1	5.14736e-19
594.3	4.88146e-19
594.4	4.71527e-19
594.6	4.61555e-19
594.7	4.5793e-19
594.8	4.51584e-19
595	4.45994e-19
595.1	4.38742e-19
595.3	4.57174e-19
595.4	4.28166e-19
595.6	5.19873e-19
595.7	7.52842e-19
595.8	7.98468e-19
596	8.04663e-19
596.1	7.36978e-19
596.3	7.00416e-19
596.4	6.87876e-19
596.6	6.69444e-19
596.7	6.17321e-19
596.8	5.9768e-19
597	5.46161e-19
597.1	5.16096e-19
597.3	5.46312e-19
597.4	5.56586e-19
597.6	5.1942e-19
597.7	4.83613e-19
597.8	4.51433e-19
598	4.29073e-19
598.1	4.00821e-19
598.3	4.05957e-19
598.4	3.90698e-19
598.6	3.82842e-19
598.7	3.78158e-19
598.8	3.84353e-19
599	3.63957e-19
599.1	3.42654e-19
599.3	3.61388e-19
599.4	5.96925e-19
599.6	7.59942e-19
599.7	7.05251e-19
599.8	6.68387e-19
600	6.29408e-19
600.1	6.15055e-19
600.3	5.50241e-19
600.4	5.63083e-19
600.6	5.29542e-19
600.7	5.23499e-19
600.8	5.25614e-19
601	5.31506e-19
601.1	4.76513e-19
601.3	4.32699e-19
601.4	4.259e-19
601.6	4.45088e-19
601.7	3.93115e-19
601.8	4.11547e-19
602	4.01878e-19
602.2	3.8964e-19
602.3	3.59424e-19
602.5	3.70302e-19
602.6	3.4069e-19
602.8	3.49453e-19
602.9	3.44316e-19
603	3.16064e-19
603.2	4.35116e-19
603.3	6.06292e-19
603.5	6.43005e-19
603.6	6.07954e-19
603.8	5.66709e-19
603.9	5.42082e-19
604	5.61572e-19
604.2	5.33773e-19
604.3	4.93887e-19
604.5	5.01743e-19
604.6	4.79836e-19
604.8	4.47958e-19
604.9	4.54001e-19
605	4.34059e-19
605.2	4.29828e-19
605.3	3.98403e-19
605.5	3.93115e-19
605.6	3.5323e-19
605.8	3.65316e-19
605.9	3.51417e-19
606	3.72115e-19
606.2	3.84806e-19
606.3	3.3646e-19
606.5	2.87509e-19
606.6	2.95214e-19
606.8	2.87962e-19
606.9	3.3646e-19
607	4.15627e-19
607.2	4.57476e-19
607.3	4.90865e-19
607.5	5.36643e-19
607.6	5.38154e-19
607.8	5.07484e-19
607.9	5.2924e-19
608	5.12923e-19
608.2	4.76059e-19
608.3	4.12001e-19
608.5	4.20612e-19
608.6	4.36778e-19
608.8	4.16231e-19
608.9	4.04144e-19
609	3.9236e-19
609.2	3.68489e-19
609.3	3.78763e-19
609.5	3.3933e-19
609.6	3.21351e-19
609.8	3.25884e-19
609.9	3.35553e-19
610	3.29661e-19
610.2	3.26186e-19
610.3	3.08812e-19
610.5	3.16064e-19
610.6	3.18783e-19
610.8	3.0307e-19
610.9	3.55043e-19
611	4.24238e-19
611.2	4.44181e-19
611.3	4.78779e-19
611.5	4.48411e-19
611.6	4.72433e-19
611.8	4.90714e-19
611.9	4.85275e-19
612	4.26807e-19
612.2	4.01274e-19
612.3	4.00216e-19
612.5	4.24389e-19
612.6	4.06259e-19
612.8	3.58518e-19
612.9	3.42201e-19
613	3.3646e-19
613.2	3.26488e-19
613.3	3.25733e-19
613.5	3.39028e-19
613.6	3.16517e-19
613.8	3.06999e-19
613.9	3.18179e-19
614	3.01257e-19
614.2	2.98689e-19
614.3	2.78142e-19
614.5	2.7512e-19
614.6	2.64393e-19
614.8	2.88567e-19
614.9	3.15912e-19
615	3.8677e-19
615.2	4.09281e-19
615.3	3.94928e-19
615.5	4.24843e-19
615.6	4.07317e-19
615.8	3.79367e-19
615.9	3.86014e-19
616	4.06562e-19
616.2	3.9795e-19
616.3	3.52172e-19
616.5	3.5051e-19
616.6	3.1561e-19
616.8	3.25128e-19
616.9	3.60633e-19
617	3.59424e-19
617.2	3.29661e-19
617.3	3.12286e-19
617.5	2.88718e-19
617.6	2.9461e-19
617.8	2.73005e-19
617.9	2.9461e-19
618	2.96725e-19
618.2	2.74516e-19
618.3	2.56839e-19
618.5	3.10776e-19
618.6	2.87962e-19
618.8	2.67113e-19
618.9	2.8766e-19
619	2.74365e-19
619.2	2.8479e-19
619.3	3.56251e-19
619.5	3.50661e-19
619.6	3.69547e-19
619.8	3.79065e-19
619.9	3.69547e-19
620	3.73928e-19
620.2	3.7e-19
620.3	3.37366e-19
620.5	3.25128e-19
620.6	3.31625e-19
620.8	3.33438e-19
620.9	3.27999e-19
621	3.23164e-19
621.2	2.97329e-19
621.3	2.76933e-19
621.5	3.05488e-19
621.6	2.99747e-19
621.8	2.68019e-19
621.9	2.66811e-19
622	2.26774e-19
622.2	2.22997e-19
622.3	2.69681e-19
622.5	3.05186e-19
622.6	2.9461e-19
622.8	2.47926e-19
622.9	2.29494e-19
623	2.49739e-19
623.2	2.86905e-19
623.3	2.88416e-19
623.5	3.19992e-19
623.6	3.57611e-19
623.8	3.52021e-19
624	2.99898e-19
624.2	3.26186e-19
624.3	3.1274e-19
624.5	3.16819e-19
624.6	2.98689e-19
624.8	2.96876e-19
625	2.89926e-19
625.2	3.002e-19
625.3	2.87962e-19
625.5	2.53969e-19
625.6	2.81013e-19
625.8	2.84034e-19
626	2.8343e-19
626.2	2.48379e-19
626.3	2.43091e-19
626.5	2.59106e-19
626.6	2.70437e-19
626.8	2.39767e-19
627	2.30551e-19
627.2	2.39918e-19
627.3	2.50343e-19
627.5	2.47926e-19
627.6	2.62581e-19
627.8	2.67566e-19
628	3.04732e-19
628.2	3.18179e-19
628.3	2.96121e-19
628.5	2.86149e-19
628.6	2.95819e-19
628.8	2.85545e-19
629	3.07905e-19
629.2	2.74063e-19
629.3	2.66811e-19
629.5	2.62278e-19
629.6	2.46566e-19
629.8	2.39767e-19
630	2.8157e-19
631	2.841e-19
632	2.85964e-19
633	1.95738e-19
634	2.57815e-19
635	2.31344e-19
636	2.01517e-19
637	2.32463e-19
638	2.2948e-19
639	2.0972e-19
640	2.02076e-19
641	2.77203e-19
642	2.70492e-19
643	2.12143e-19
644	2.29107e-19
645	2.21091e-19
646	2.54273e-19
647	2.1699e-19
648	2.27056e-19
649	2.24074e-19
650	1.98535e-19
651	2.12702e-19
652	2.17549e-19
653	2.14939e-19
654	1.9928e-19
655	2.38428e-19
656	1.91264e-19
657	1.90519e-19
658	1.85299e-19
659	2.07669e-19
660	1.94433e-19
661	1.85299e-19
662	1.75605e-19
663	1.82503e-19
664	1.81384e-19
665	1.6703e-19
666	1.56404e-19
667	1.77097e-19
668	1.68708e-19
669	1.67962e-19
670	1.88841e-19
671	1.78401e-19
672	1.81943e-19
673	1.69453e-19
674	1.49693e-19
675	1.4988e-19
676	1.62183e-19
677	1.63115e-19
678	1.53794e-19
679	1.47829e-19
680	1.39999e-19
681	1.67403e-19
682	1.34593e-19
683	1.50252e-19
684	1.45406e-19
685	1.41118e-19
686	1.29933e-19
687	1.31051e-19
688	1.27696e-19
689	1.27696e-19
690	1.31238e-19
691	1.27323e-19
692	1.29187e-19
693	1.07563e-19
694	1.08309e-19
695	1.0197e-19
696	1.098e-19
697	1.13342e-19
698	1.22476e-19
699	9.61914e-20
700	1.01411e-19
701	1.04767e-19
702	9.15309e-20
703	8.78026e-20
704	7.84817e-20
705	5.72301e-20
706	8.01595e-20
707	7.233e-20
708	6.00264e-20
709	5.68573e-20
710	7.21435e-20
711	6.89744e-20
712	6.07721e-20
713	6.22634e-20
714	5.72301e-20
715	7.30756e-20
716	5.61116e-20
717	5.12648e-20
718	5.70437e-20
719	4.82821e-20
720	7.08386e-20
721	3.8402e-20
722	6.15177e-20
723	3.65378e-20
724	3.1691e-20
725	2.90811e-20
726	2.38614e-20
727	3.76563e-20
728	2.5912e-20
729	2.77762e-20
730	2.5912e-20
731	1.99467e-20
732	2.74034e-20
733	1.93874e-20
734	1.19307e-20
735	8.94804e-21
736	1.65911e-20
737	1.99467e-20
738	9.50729e-21
739	7.27028e-21
740	5.03327e-21
741	6.15177e-21
742	1.71504e-20
743	1.4727e-20
744	1.67776e-20
745	8.94804e-21
746	1.82689e-20
747	2.49799e-20
748	1.58455e-20
749	4.26896e-20
750	3.00132e-20
